# Supplementary material for: Claustrum and dorsal endopiriform cortex complex cell-identity is determined by Nurr1 and regulates hallucinogenic-like states in mice
Source: PubMed Central journal article supplement (PMC11408527; doi:10.1038/s41467-024-52429-9), 2024-09-18
Supplement: 41467_2024_52429_MOESM1_ESM.pdf [file 41467_2024_52429_MOESM1_ESM.pdf]

## Supplementary Information

### Supplementary Figures

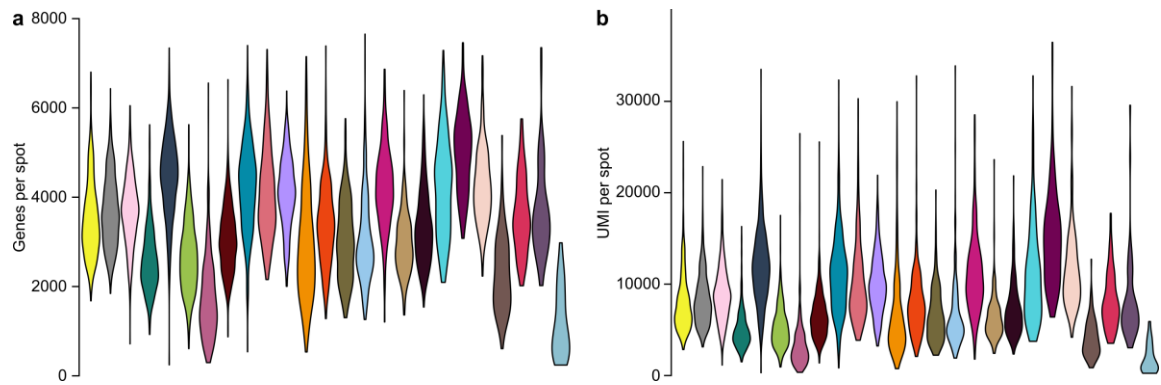

**Supplementary Fig.1: Genes and UMI per spot per Cluster. (a, b)** Violin plots showing the number of genes (a) and the UMI per spot (b) in each cluster. Abbreviations: UMI: unique molecular identifier.

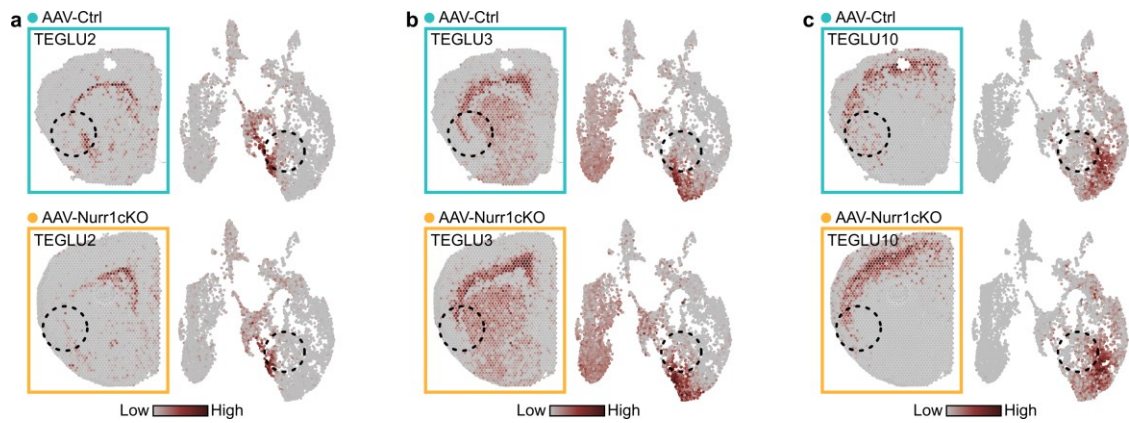

**Supplementary Fig.2: Visualization of CLA-adjacent cortical layer specific clusters in AAV-Nurr1cKO mice. (a-c)** On-tissue (left) and 2D-UMAP (right) visualization of TEGLU2 (L6b-specific) **(a)**, TEGLU3 (L6a-specific) **(b)** and TEGLU10 (L5-specific) **(c)** from AAV-Ctrl and AAV-Nurr1cKO sections. Abbreviations: AAV: adeno-associated virus, CLA: claustrum/dorsal endopiriform cortex, TEGLU: telencephalon excitatory projecting neurons, L6b: critical layer 6b, L6a: cortical layer 6a, L5: cortical layer 5.

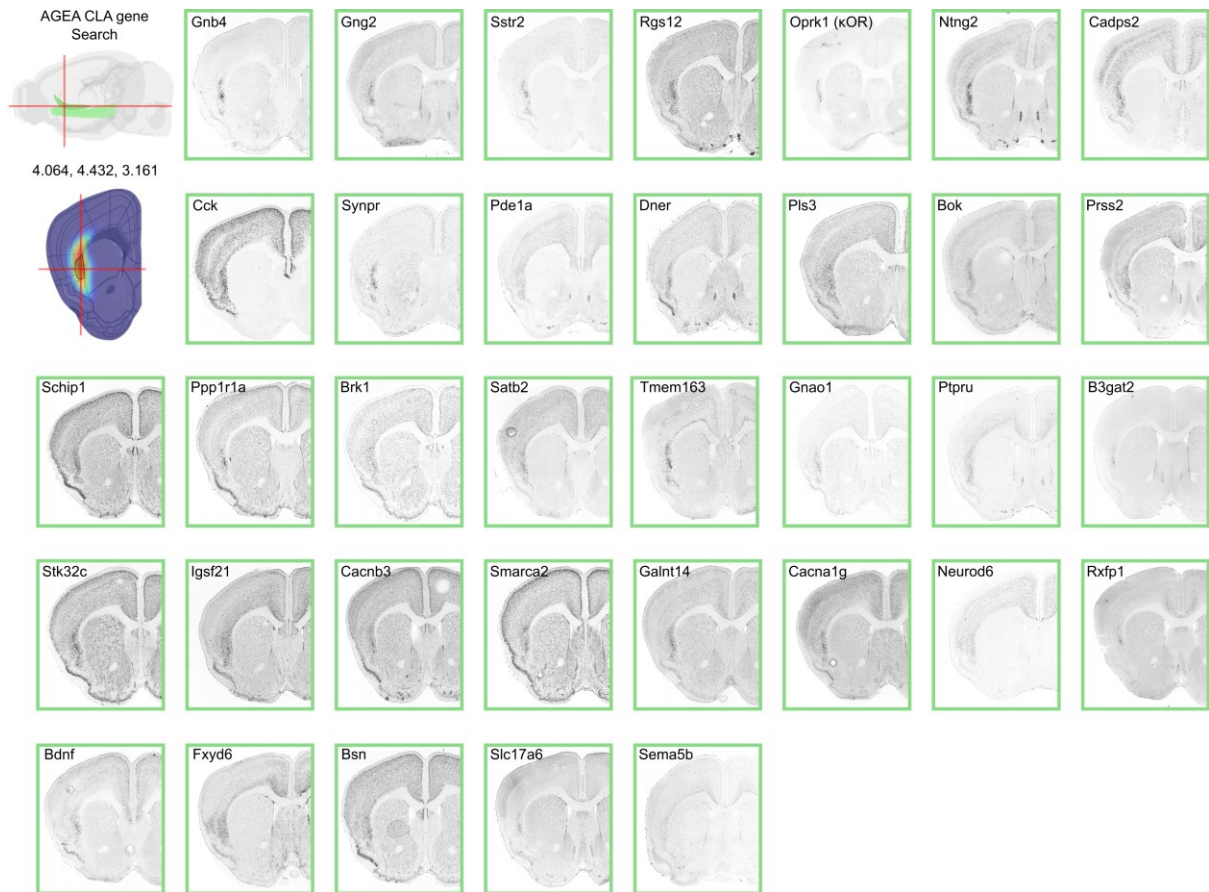

**Supplementary Fig.3: Selected CLA enriched genes according to AGEA Fine Structure Search of the Allen brain atlas.** Illustration showing the brain location that was used for searching of genes that are enriched in CLA region and representative ISH images of the CLA-specific genes that were selected from Allen brain atlas ISH database. Abbreviations: CLA: claustrum/dorsal endopiriform cortex complex

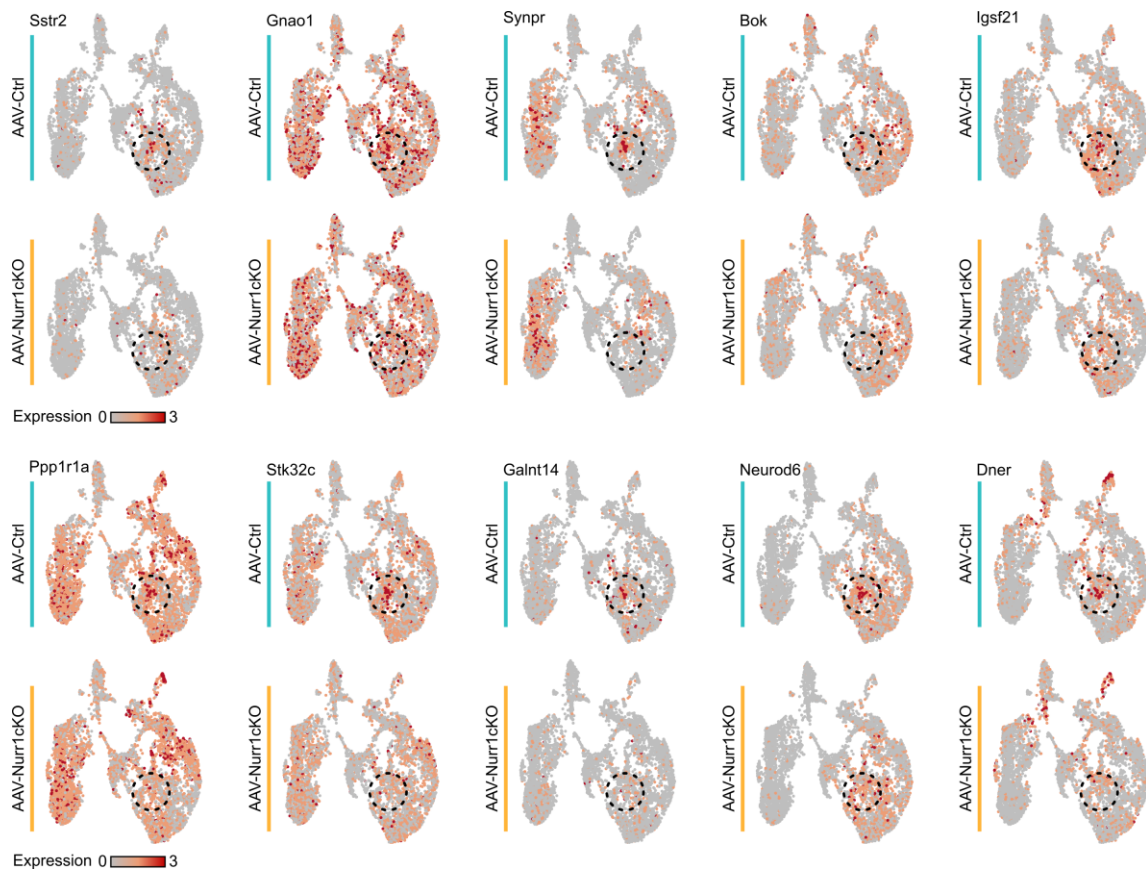

**Supplementary Fig.4: 2D-UMAPs from CLA enriched genes.** Visualization of the expression of several CLA enriched genes in the 2D-UMAP space from AAV-Ctrl and AAV-Nurr1cKO sections. The dashed circle denotes the location in 2D-UMAP of CLA spots from AAV-Ctrl mice. Abbreviations: AAV: adeno-associated virus.

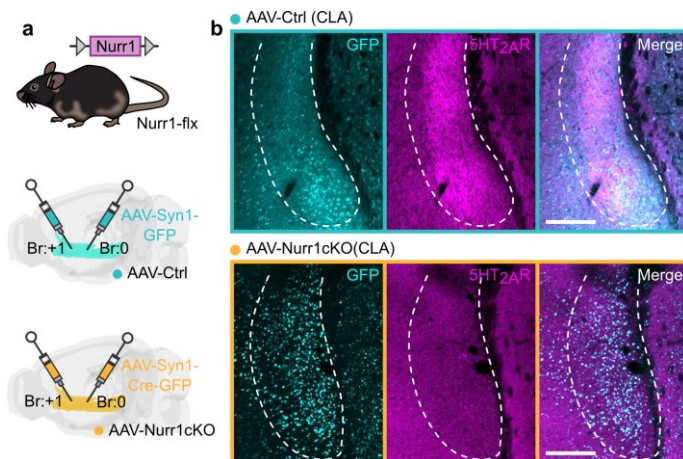

**Supplementary Fig.5: AAV-Nurr1cKO mice display diminished 5HT<sub>2A</sub>R protein levels in CLA. (a)** Illustration of Nurr1-flx mouse line construct and the viral strategy of Nurr1 deletion in CLA. **(b)** Fluorescent images showing GFP and 5HT<sub>2A</sub>R expression in CLA of AAV-Ctrl and AAV-Nurr1cKO mice (scale bar: 200 μm). Abbreviations: AAV: adeno-associated virus, CLA: claustrum/dorsal endopiriform coprtex, GFP: green fluorescent protein.



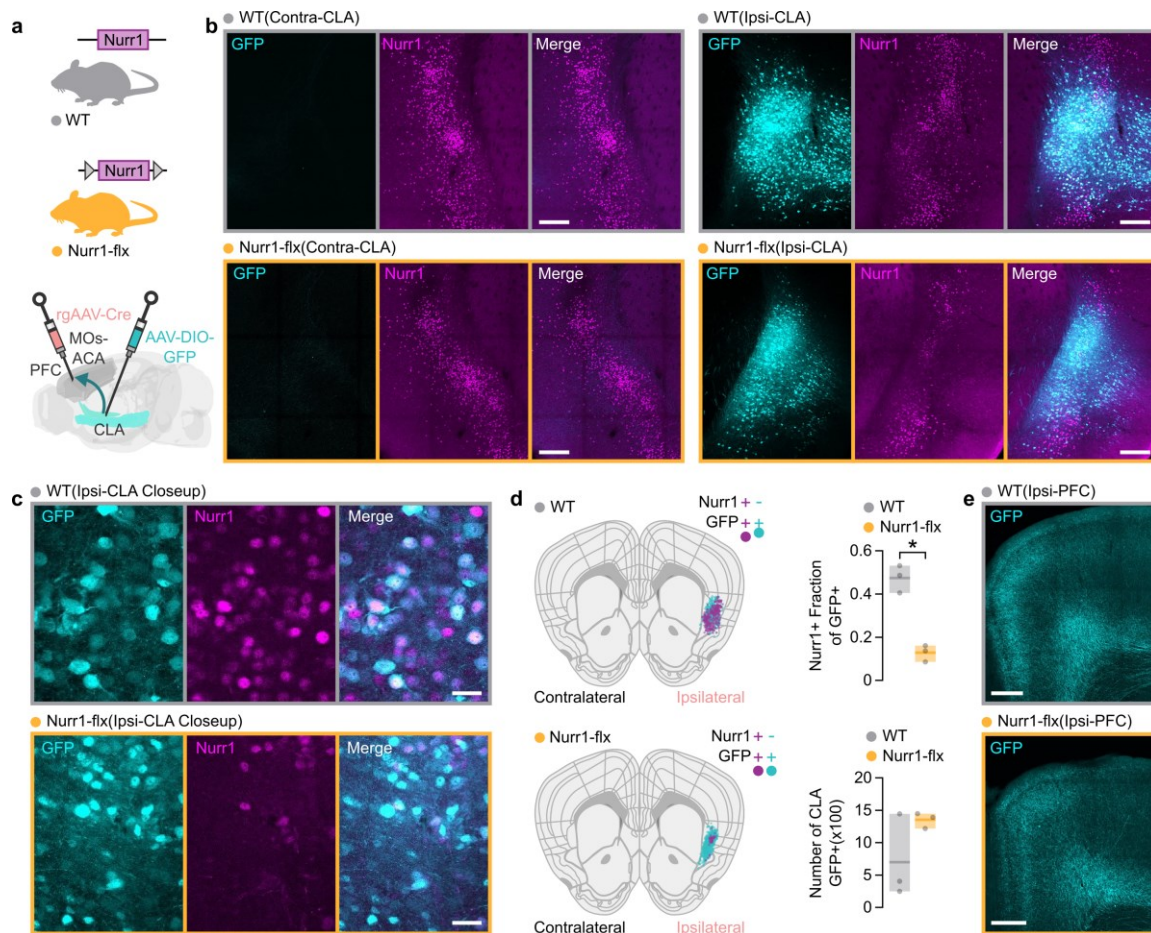

**Supplementary Fig. 6. Retrograde deletion of Nurr1 and labelling of CLA-cortical projecting cells in Nurr1-flx mice.** (a) Illustration showing the WT and Nurr1-flx mice subjected to simultaneous injections of the rgAAV-Cre in PFC and the AAV-DIO-GFP in CLA. (b) Fluorescent images showing GFP and Nurr1 expression the ipsilateral and contralateral to the injections CLAs of WT and Nurr1-flx mice (scale bar: 200  $\mu$ m). (c) Closeup fluorescent pictures showing GFP and Nurr1 expression in the ipsilateral to the injections CLAs of WT and Nurr1-flx mice (scale bar: 20  $\mu$ m). (d) Illustration showing the localization of GFP positive and Nurr1/GFP double positive cells in the ipsilateral CLAs of WT and Nurr1-flx mice (left). Boxplots showing the fraction of Nurr1 positive cells in GFP labelled population and the absolute number (counted from 3 sections with 50  $\mu$ m thickness) of GFP labelled population in the CLAs of WT and Nurr1-flx mice (WT: n=3, Nurr1-flx: n=3; \*p=0.0013, Two-tailed Unpaired t-test). (e) Fluorescent images showing the GFP labelled fibers in PFC of WT and Nurr1-flx mice. Bar-graphs are expressed as mean  $\pm$  minima/maxima. Abbreviations: rgAAV: retrograde adeno-associated virus. WT: wild type, MOs: secondary motor area, ACA: anterior cingulate area, PFC: prefrontal cortex, CLA: claustrum/dorsal endopiriform cortex, GFP: green fluorescent protein. Source data are provided as a Source Data file.

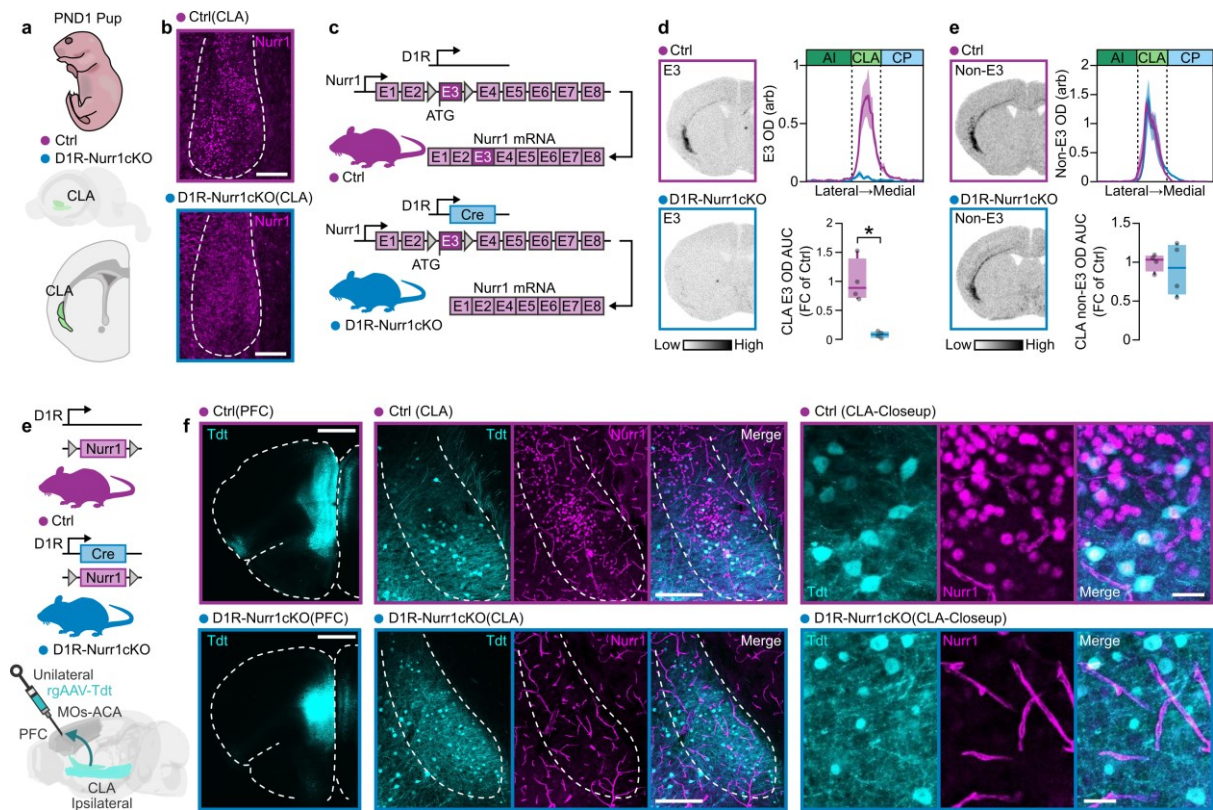

**Supplementary Fig.7: PND1 CLA Nurr1 levels, non-coding Nurr1 mRNA expression and retrograde tracing of CLA cells in D1R-Nurr1cKO mice.** (a) Fluorescent images showing Nurr1 immunolabelling in CLA of Ctrl and D1R-Nurr1cKO PND1 pups. (b) Illustration of the detailed D1R-Nurr1cKO mouse construct. (c) ISH autoradiographs (left) and graphs (right), showing the mRNA signal obtained from the E3 targeting Nurr1 probe at CLA of Ctrl and D1R-Nurr1cKO mice (Ctrl: n=4, D1R-Nurr1cKO: n=4; \* $p < 0.0001$ , Two-tailed Unpaired t-test). (d) ISH autoradiographs (left) and graphs (right), showing the mRNA signal obtained from the Non-E3 targeting Nurr1 probe at CLA of Ctrl and D1R-Nurr1cKO mice (Ctrl: n=4, D1R-Nurr1cKO: n=4). (e) Illustration showing the experimental setup unilateral retrograde tracing of CLA with rgAAV-Tdt. (f) Fluorescent images showing the rgAAV-Tdt injection site in PFC (left), and the retrogradely labelled CLA cells (center: low magnification, right: high magnification) in Ctrl and D1R-Nurr1cKO mice. Nurr1 immunofluorescence showing double Nurr1/Tdt+ cells in Ctrl but not in D1R-Nurr1cKO mice (left scale bar: 1mm, central scale bar: 200 $\mu$ m, right scale bar: 20 $\mu$ m). Data from line-graphs are expressed as mean $\pm$ SEM. Abbreviations: PND1: postnatal day 1 E: exon, ATG: starting codon, CLA: claustrum/dorsal endopiriform cortex complex, AI: agranular insula, CP: caudoputamen, OD: optic density, arb:

arbitrary units, AUC: area under the curve, FC: fold change. Source data are provided as a Source Data file.

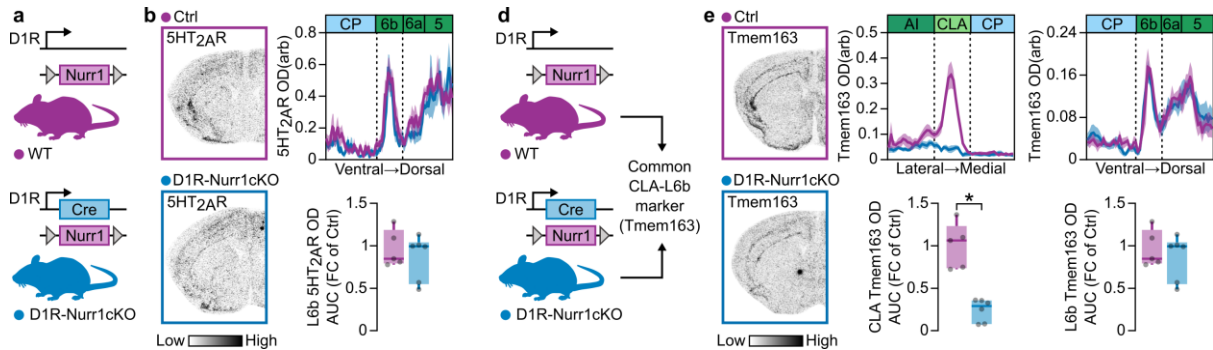

**Supplementary Fig.8: 5HT<sub>2A</sub>R and Tmem163 expression is unchanged in L6b of D1R-Nurr1cKO mice.** (a) Illustration of D1R-Nurr1cKO mouse strain construct. (b) Left: ISH autoradiographs showing 5HT<sub>2A</sub>R mRNA at CLA of Ctrl and D1R-Nurr1cKO mice (Ctrl: n=5, D1R-Nurr1cKO: n=6). (c) Illustration showing the selection of Tmem163 as a suitable marker to compare Nurr1 induced changes in CLA and L6b of D1R-Nurr1cKO mice. (d) Left: ISH autoradiographs showing the distribution of Tmem163 in Ctrl and D1R-Nurr1cKO mice. Center: Line-graph (upper) and boxplot (lower) showing the Tmem163 mRNA OD quantification in CLA (Ctrl: n=5, D1R-Nurr1cKO: n=6; \*p=0.0002, Two-tailed Unpaired t-test). Right: Line-graph (upper) and boxplot (lower) showing the Tmem163 mRNA OD quantification in L6b (Ctrl: n=5, D1R-Nurr1cKO: n=6). Data from line-graphs are expressed as mean ± SEM. Boxplots show all data points, the 25th and 75th percentile (box), the median (center) and the maxima (whiskers). Abbreviations: L6b: cortical layer 6b, CLA: claustrum/dorsal endopiriform cortex complex, AI: agranular insula, CP: caudoputamen, OD: optic density, arb: arbitrary units, AUC: area under the curve, FC: fold change. Source data are provided as a Source Data file.



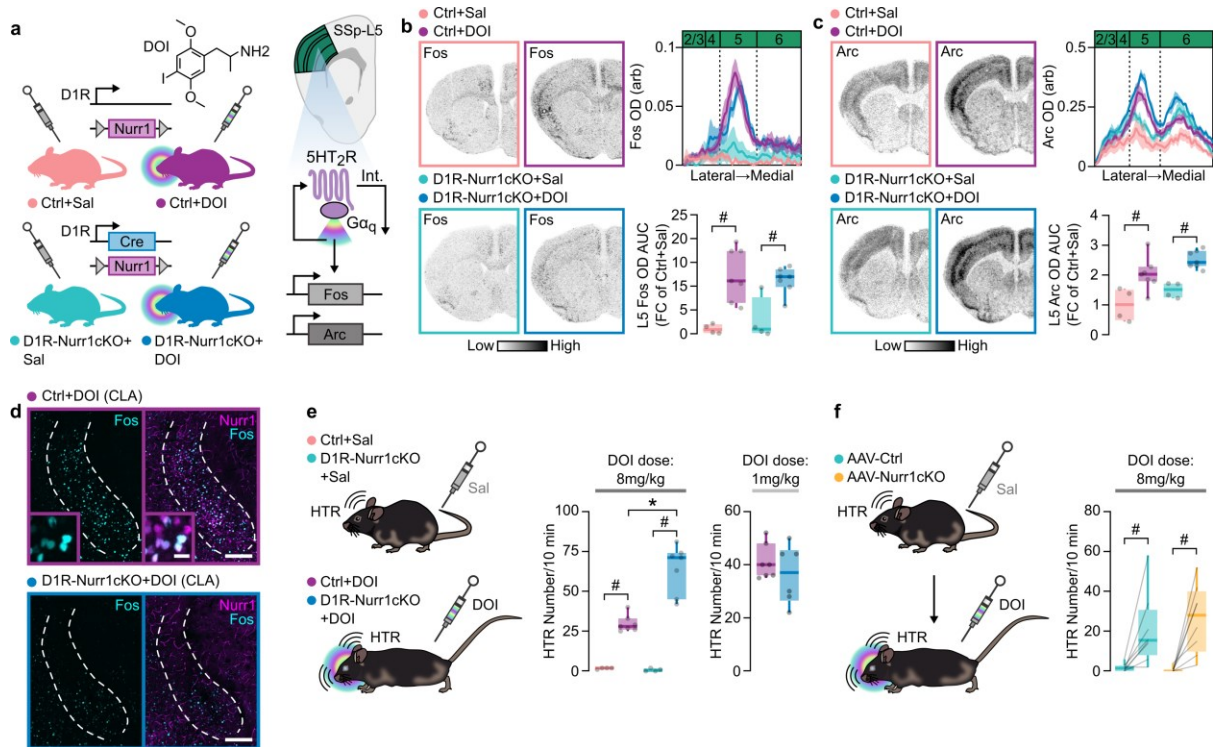

**Supplementary Fig.9: DOI response after Nurr1 deletion in CLA.** **(a)** Left: Illustration of the systemic DOI (8 mg/kg ip) administration experimental set up. Right: Illustration of 5HT<sub>2</sub>R-mediated effects on the SSp-L5. **(b)** ISH autoradiographs (left) and graphs (right) showing Fos mRNA in SSp-L5 of Ctrl and D1R-Nurr1cKO mice treated with DOI. (Ctrl+Sal: n=4, Ctrl+DOI: n=7, D1R Nurr1cKO+Sal: n=4, D1RNurr1cKO+DOI: n=7; two-way ANOVA, Treatment:  $F(1,18)=30.15$ ,  $p<0.0001$ ; Sal vs DOI:  $\#p<0.01$ , Sidak's post-hoc test). **(c)** ISH autoradiographs (left) and graphs (right) showing Arc mRNA in SSp-L5 of Ctrl and D1R-Nurr1cKO mice treated with DOI. (Ctrl+Sal: n=4, Ctrl+DOI: n=7, D1R-Nurr1cKO+Sal: n=4, D1R-Nurr1cKO+DOI: n=7; two-way ANOVA, Treatment:  $F(1,18)=28.12$ ,  $p<0.0001$ ; Sal vs DOI:  $\#p<0.05$ , Sidak's posthoc test). **(d)** Immunofluorescence in CLA showing double Fos/Nurr1 double positive cells in Ctrl mice but not in D1R-Nurr1cKO mice treated with DOI (scale bar: 100 $\mu$ m, inlet scale bar: 20 $\mu$ m). **(e)** Illustration (left) showing the experimental setup of DOI-induced (8 mg/kg or 1 mg/kg) HTR and boxplot (right) showing the 10 min HTR count of Ctrl and D1R-Nurr1cKO (Ctrl+Sal: n=4, Ctrl+DOI: n=7, D1R-Nurr1cKO+Sal: n=4, D1RNurr1cKO+DOI: n=7; two-way ANOVA, Genotype $\times$ Treatment:  $F(1,18)=18.83$ ,  $p=0.0004$ ; Ctrl vs D1R-Nurr1cKO:  $*p<0.0001$ , Sal vs DOI:  $\#p<0.001$ , Sidak's post-hoc test). **(f)** Illustration (left) showing the experimental setup of DOI-induced (8 mg/kg) HTR and boxplot (right) showing the 10 min HTR count of AAV-Ctrl and AAV-Nurr1cKO mice (AAV-Ctrl: n=8, AAV-Nurr1cKO: n=8; repeated measures two-way ANOVA, Treatment:  $F(1,14)=27.19$ ,  $p=0.0001$ ; Sal vs DOI:  $\#p<0.01$ , Sidak's post-hoc test). Data in line-graphs are

expressed as mean  $\pm$  SEM. Boxplots show all data points, the 25th and 75th percentile (box), the median (center) and the maxima (whiskers). Abbreviations: DOI: 2,5-dimethoxy-4-iodoamphetamine, ip: intraperitoneal, SSp: primary somatosensory area, Sal: saline, CLA: claustrum/dorsal endopiriform cortex complex, arb: arbitrary units, AUC: area under the curve, FC: fold change, HTR: head twitch response, AAV: adenoassociated virus. Source data are provided as a Source Data file.

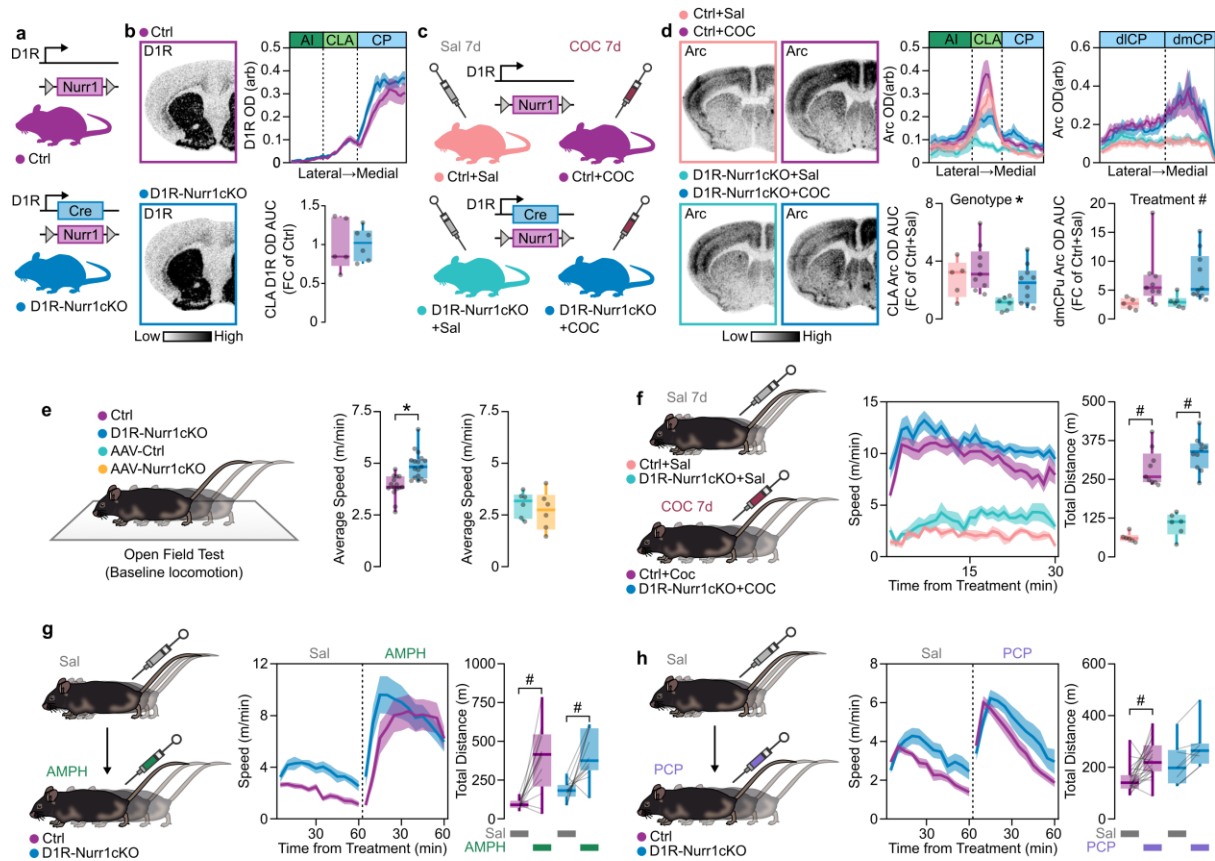

**Supplementary Fig.10. Psychostimulant effects on D1R-Nurr1cKO mice.** (a) Schematic depiction of the D1-Nurr1cKO mouse line. (b) ISH Autoradiographs and graphs showing the expression of D1R in the CLA of Ctrl and D1-Nurr1cKO mice (Ctrl: n=5, D1R-Nurr1cKO: n=6). (c) Illustration of the subchronic COC (10mg/kg) administration. (d) ISH autoradiographs and graphs showing the expression of Arc expression in CLA (left) and dmCP (right) of Ctrl and D1-Nurr1cKO mice after the subchronic administration of cocaine (Ctrl+Sal: n=6, Ctrl+COC: n=9, D1R-Nurr1cKO+Sal: n=6, D1R-Nurr1cKO+DOI: n=11; CLA: Two-way ANOVA, Treatment:  $F(1, 26)=8.099$ ,  $*p=0.0085$ ; dmCP: Two-way ANOVA, Treatment:  $F(1, 26)=9.022$ ,  $\#p=0.0058$ ). (e) Schematic depiction of OFT (left) and boxplots (right) showing the baseline average locomotion speed of Ctrl, D1-Nurr1cKO, AAV-Ctrl and AAV-Nurr1cKO mice (Ctrl: n=15, D1R-Nurr1cKO: n=17;  $*p<0.0001$ , Two-tailed Unpaired t-test). (f) Schematic depiction of OFT after subchronic Sal or COC treatment (left). Graphs showing the Speed (center) and the total distance covered (right) of Ctrl and D1-Nurr1cKO mice treated with Sal or COC for 7 days (Ctrl+Sal: n=6, Ctrl+COC: n=9, D1R-Nurr1cKO+Sal: n=6, D1R-Nurr1cKO+DOI: n=11; Two-way ANOVA, Treatment:  $F(1, 27)=148.5$ ,  $p<0.0001$ , Genotype:  $F(1, 27)=6.086$ ,  $p<0.05$ ; Sal vs COC:  $\#p<0.0001$ , Sidak's post-hoc test). (g) Schematic depiction of OFT after acute Sal and AMPH treatment (left). Graphs showing the Speed

(center) and the total distance covered (right) of Ctrl and D1-Nurr1cKO after the acute treatment of Sal and AMPH (Ctrl: n=13, D1R-Nurr1cKO: n=12; Repeated measures Two-way ANOVA, Treatment:  $F(1, 23)=39.36$ ,  $p<0.0001$ ; Sal vs AMPH:  $\#p<0.01$ , Sidak's post-hoc test). Schematic depiction of OFT after acute Sal and PCP treatment (left). Graphs showing the Speed (center) and the total path-distance (right) of Ctrl and D1-Nurr1cKO after Sal and PCP (Ctrl: n=22, D1R-Nurr1cKO: n=8; Repeated measures Two-way ANOVA, Treatment:  $F(1, 28)=18.27$ ,  $p<0.001$ ; Sal vs PCP:  $\#p<0.001$ , Sidak's post-hoc test). Line-graphs' data are expressed as mean $\pm$ SEM. Boxplots show all data points, the 25th and 75th percentile (box), the median (center) and the maxima (whiskers). Abbreviations: ISH: in situ hybridization, CLA: claustrum/dorsal endopiriform cortex complex, AI: agranular insula, CP: caudoputamen, dlCP: dorsolateral caudoputamen, dmCP: dorsomedial caudoputamen, Sal: saline, COC: cocaine, 7d: 7 days, OFT: open field test, AMPH: amphetamine, PCP: phencyclidine. Source data are provided as a Source Data file.



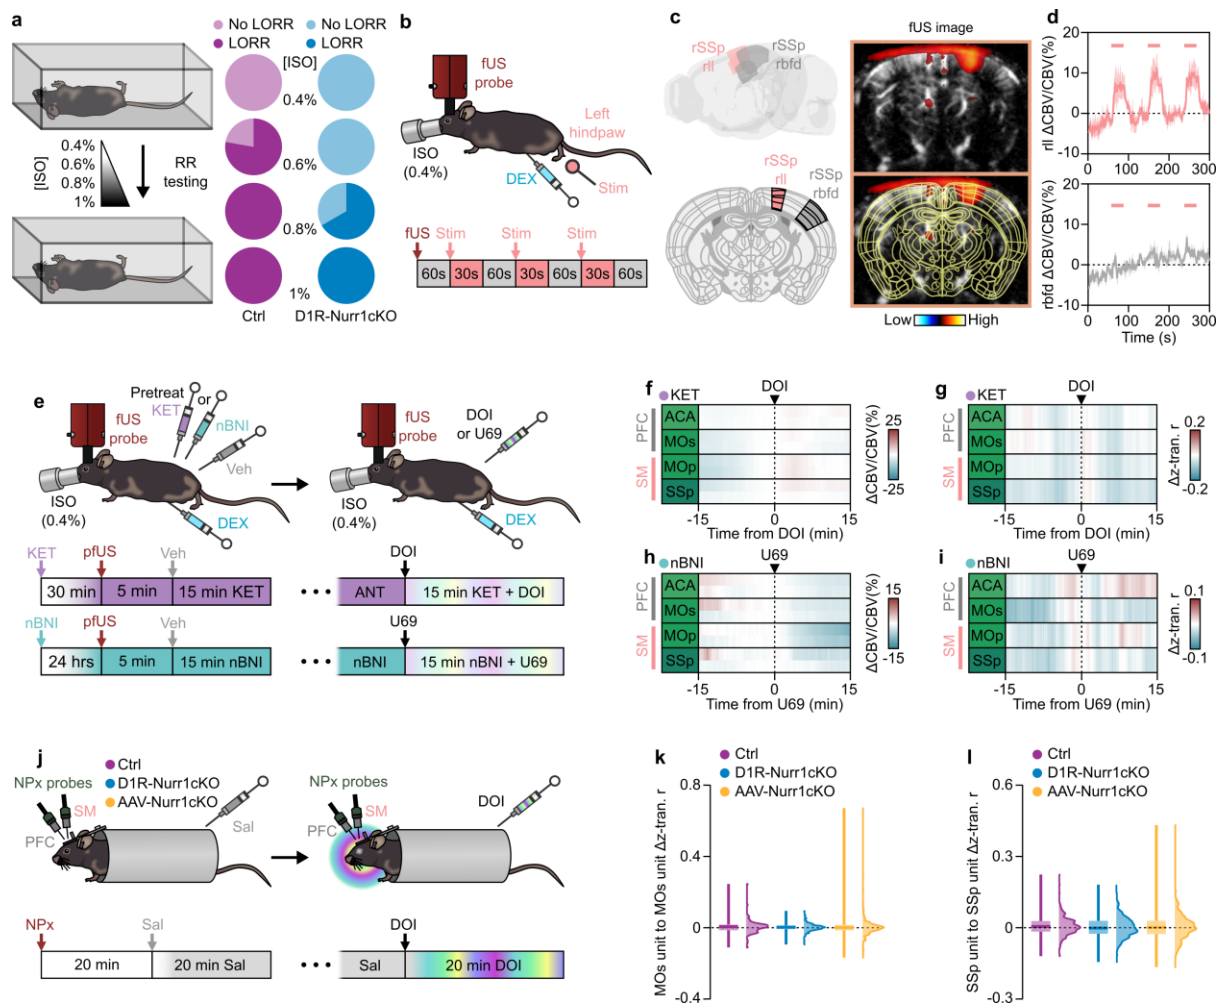

**Supplementary Fig.11: Validation of the pfUS sedation protocol, the effects of 5HT<sub>2</sub>R or κOR antagonists on pfUS, and within-region unit correlation in neuropixel recordings.**

(a) Left: Illustration showing the the ISO sensitivity experiment. Right: Pie-charts showing the percentage of Ctrl and D1R-Nurr1cKO mice that exhibited LORR at each ISO concentration. (b) Illustration showing the fUS recording and the tactile stimulus protocol. (c) Left: Schematic depiction of selected brain regions (rSSp-ll: pink, rSSp-bfd: gray). Right: fUS images showing the activation of R SSp-ll after the tactile-stimulus. (d) Line-graphs (n=3) showing CBV changes in rSSp-ll and rSSp-bfd after the left-hindpaw stimulation. (e) Illustration showing the pfUS recordings with pretreatment of KET (1mg/kg ip) or nBNI (32 mg/kg ip) and the treatment with DOI (1 mg/kg ip) or U69 (1 mg/kg sc) respectively. (f) Heatmap showing CBV changes over time after KET and DOI combination (n=7). (g) Heatmap showing the the mean  $\Delta z$ -transformed r-coefficient (correlation with the rest cortical regions) change over time after KET and DOI combination (n=7). (h) Heatmap showing CBV changes over time after nBNI and U69 combination (n=8). (i) Heatmap showing the mean  $\Delta z$ -transformed r-coefficient (correlation with the rest cortical regions) change over time after nBNI and U69 combination

(n=8). **(j)** Illustration showing the neuropixel-electrophysiological recordings. **(k, l)** Boxplot/violin plot graph showing the within-region unit  $\Delta z$ -transformed r-coefficient in MOs **(k)** and SSp **(l)** of Ctrl, D1-Nurr1cKO and AAV-Ctrl mice (Ctrl mice: n=3, Ctrl units: n=281, D1R-Nurr1cKO mice: n=4, D1R-Nurr1cKO units: n=387, AAV-Nurr1cKO mice: n=3, AAV-Nurr1cKO units: n=351. Data in line-graphs are expressed as mean  $\pm$  SEM. Boxplots show all data points, the 25th and 75th percentile (box), the median (center) and the maxima (whiskers). Abbreviations: ISO: isoflurane, RR: righting reflex, LORR: loss of righting reflex, pfUS: pharmacological functional ultrasound, DEX: dexmedetomidine, Stim: tactile stimulus, ll: lower limb, rSSp: right primary somatosensory area, bfd: barrel field, KET: ketanserin, nBNI: nor-binaltorphimine, Veh: vehicle, DOI: 2,5-dimethoxy-4-iodoamphetamine, ip: intraperitoneal, sc: subcutaneous, SM: sensorimotor, PFC: prefrontal cortex, NPx: neuropixel, Sal: saline, MOs: secondary motor area. Source data are provided as a Source Data file.
