# Supplementary material for: Claustrum and dorsal endopiriform cortex complex cell-identity is determined by Nurr1 and regulates hallucinogenic-like states in mice
Source: PubMed Central journal article supplement (PMC11408527; doi:10.1038/s41467-024-52429-9), 2024-09-18
Supplement: 41467_2024_52429_MOESM3_ESM.pdf [file 41467_2024_52429_MOESM3_ESM.pdf]

## Description of Additional Supplementary Files

**Supplementary Data 1. Spots count per cluster.** The table displays the number of spots for each cluster across three categories: within each cluster, across its respective samples, and across both sample types.

**Supplementary Data 2. Marker genes for each cluster from the Nurr1 dataset clustering analysis.** These genes were used for clusters identification. Multiple-testing adjusted P-values computed by PRESTO.

**Supplementary Data 3. Differentially expressed genes in AAV-Nurr1cKO compared to the AAV-Ctrl for the CLA selected spots.** Multiple-testing adjusted P-values computed by PRESTO.
